# Supplementary material for: Prospective trial on telemonitoring of geriatric cancer patients using handheld devices
Source: Springer Nature journal article supplement (doi:10.1007/s00066-019-01548-0), 2019-11-18
Supplement: MOESM2 [file 17401076]

Supplementary appendix

Supplementary table 2a) Functioning scales of the EORTC-QLQ-C30 questionnaire.

| **Functioning scales (mean values: 0-100; higher scores indicate better function)** | | | | |
| --- | --- | --- | --- | --- |
| **Scale** | **Month-1** | **Month-2** | **Month-3** | **Month-4** |
| **General HRQOL (mean)** | 59.9 | 62.7 | 71.1 | 63.9 |
| **SD** | 27.1 | 17.5 | 19.9 | 23.7 |
| **Number** | 27 | 25 | 19 | 18 |
| **SEM** | 5.2 | 3.5 | 4.6 | 5.6 |
|  | | | | |
| **Physical functioning (mean)** | 77.3 | 74.5 | 82.1 | 75.1 |
| **SD** | 25.8 | 28.1 | 23.3 | 32.6 |
| **Number** | 27 | 22 | 19 | 19 |
| **SEM** | 5.0 | 6.0 | 5.3 | 7.5 |
|  | | | | |
| **Emotional functioning (mean)** | 64.8 | 71.7 | 75.4 | 69.4 |
| **SD** | 29.9 | 23.2 | 24.9 | 27.6 |
| **Number** | 27 | 25 | 19 | 18 |
| **SEM** | 5.8 | 4.6 | 5.7 | 6.5 |
|  | | | | |
| **Role functioning (mean)** | 65.4 | 61.8 | 69.3 | 63.9 |
| **SD** | 36.1 | 32.8 | 33.9 | 37.6 |
| **Number** | 27 | 24 | 19 | 18 |
| **SEM** | 6.9 | 6.7 | 7.8 | 8.9 |
|  | | | | |
| **Social functioning (mean)** | 68.6 | 78.5 | 75.5 | 70.6 |
| **SD** | 33.1 | 28.9 | 25.1 | 30.9 |
| **Number** | 26 | 24 | 17 | 17 |
| **SEM** | 6.5 | 5.9 | 6.1 | 7.5 |
|  | | | | |
| **Cognitive functioning (mean)** | 79.6 | 79.9 | 77.2 | 72.2 |
| **SD** | 27.5 | 22.5 | 19.4 | 26.8 |
| **Number** | 27 | 24 | 19 | 18 |
| **SEM** | 5.3 | 4.6 | 4.5 | 6.3 |

HRQOL: General health-related quality of life scale of the EORTC-QLQ-C30 questionnaire; SD: Standard deviation; SEM: Standard error of the mean

Supplementary table 2b) Symptom scales of the EORTC-QLQ-C30 questionnaire.

| **Symptom scales (0-100; higher values indicate worse symptoms)** | | | | |
| --- | --- | --- | --- | --- |
| **Scale** | **Month-1** | **Month-2** | **Month-3** | **Month-4** |
| **Fatigue (mean)** | 42.8 | 44.0 | 37.4 | 39.8 |
| **SD** | 28.7 | 30.6 | 29.4 | 33.6 |
| **Number** | 27 | 23 | 19 | 19 |
| **SEM** | 5.5 | 6.4 | 6.8 | 7.7 |
|  | | | | |
| **Nausea vomiting (mean)** | 8.6 | 6.8 | 3.5 | 7.9 |
| **SD** | 20.3 | 12.2 | 8.9 | 15.1 |
| **Number** | 27 | 22 | 19 | 19 |
| **SEM** | 3.9 | 2.6 | 2.0 | 3.5 |
|  | | | | |
| **Pain (mean)** | 34.0 | 27.3 | 21.1 | 29.8 |
| **SD** | 33.5 | 27.0 | 26.6 | 35.8 |
| **Number** | 27 | 22 | 19 | 19 |
| **SEM** | 6.4 | 5.8 | 6.1 | 8.2 |
|  | | | | |
| **Dyspnea (mean)** | 21.0 | 22.7 | 17.5 | 24.1 |
| **SD** | 26.4 | 33.2 | 28.0 | 33.9 |
| **Number** | 27 | 22 | 19 | 18 |
| **SEM** | 5.1 | 7.1 | 6.4 | 8.0 |
|  | | | | |
| **Insomnia (mean)** | 38.3 | 37.7 | 26.3 | 38.6 |
| **SD** | 31.6 | 29.0 | 28.5 | 33.8 |
| **Number** | 27 | 23 | 19 | 19 |
| **SEM** | 6.1 | 6.0 | 6.5 | 7.8 |
|  | | | | |
| **Appetite Loss (mean)** | 13.6 | 13.6 | 12.3 | 21.1 |
| **SD** | 28.1 | 24.5 | 22.8 | 35.5 |
| **Number** | 27 | 22 | 19 | 19 |
| **SEM** | 5.4 | 5.2 | 5.2 | 8.1 |
|  | | | | |
| **Constipation (mean)** | 13.6 | 18.2 | 14.0 | 10.5 |
| **SD** | 29.6 | 24.6 | 20.2 | 22.4 |
| **Number** | 27 | 22 | 19 | 19 |
| **SEM** | 5.7 | 5.2 | 4.6 | 5.1 |
|  | | | | |
| **Diarrhea (mean)** | 27.2 | 8.7 | 8.8 | 14.0 |
| **SD** | 33.4 | 15.0 | 18.7 | 23.1 |
| **Number** | 27 | 23 | 19 | 19 |
| **SEM** | 6.4 | 3.1 | 4.3 | 5.3 |
|  | | | | |
| **Financial difficulties (mean)** | 9.9 | 6.1 | 13.0 | 18.5 |
| **SD** | 20.3 | 16.7 | 28.3 | 30.7 |
| **Number** | 27 | 22 | 18 | 18 |
| **SEM** | 3.9 | 3.6 | 6.7 | 7.2 |

SD: Standard deviation; SEM: Standard error of the mean
